# Supplementary material
Source: publisher site journal article supplement (https://spandidos-publications.com/6046/downloadSupplementary)

Figure S1. Agarose gel electrophoresis of PCR product for tumor suppressor gene Von Hippel Lindau and kinase insert domain receptor genes. (A) Represent amplification of exon I of VHL gene. (B) Represent the amplification segment of axon 13 of KRD gene. Lane 1: Ladder. Lane 2-16 demonstrate PCR products of ccRCC patients. The bands for both VHL and KRD fragments for all patients were located within the expected fragment size (VHL=260 bp and KDR=290 bp).

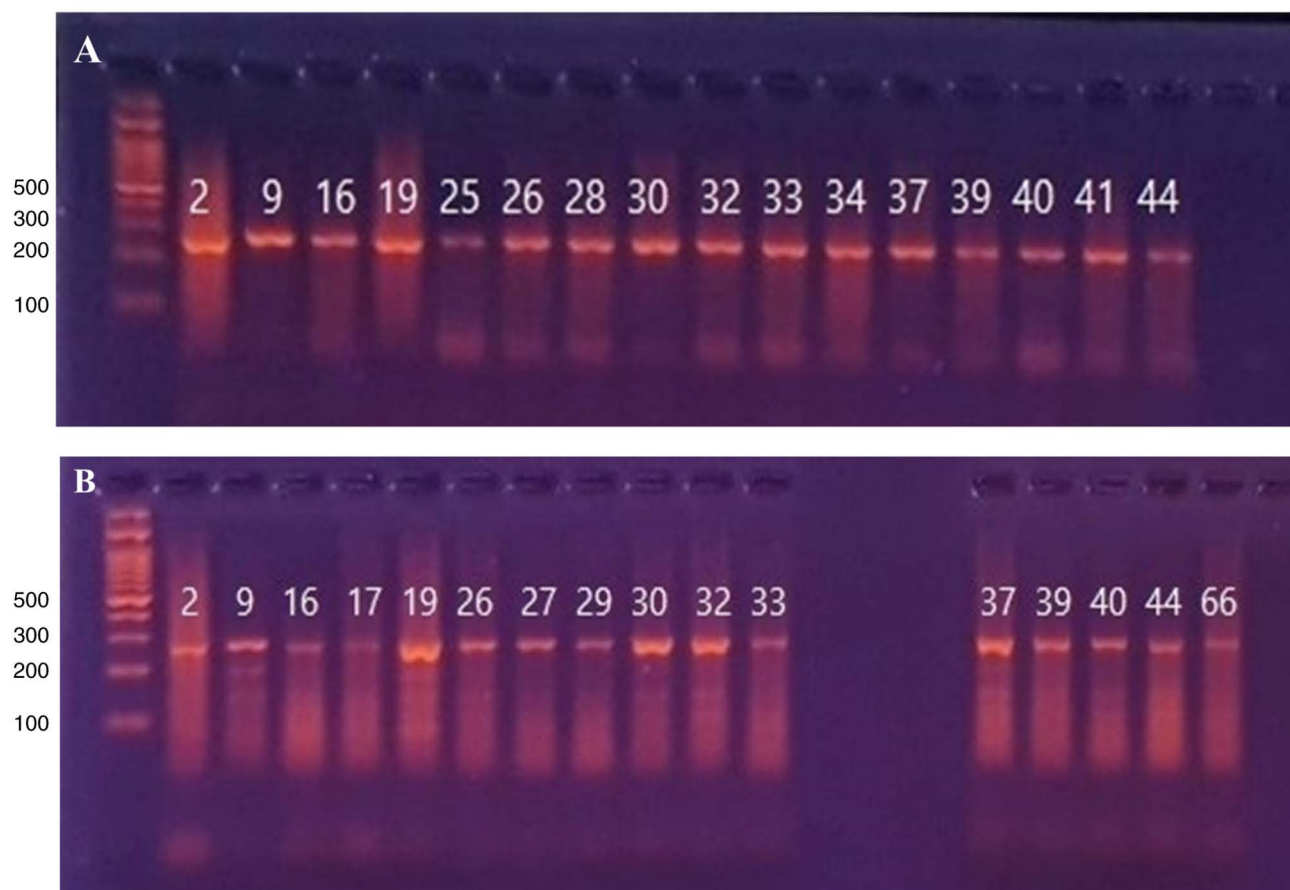

Supplement: Supplementary file 1 [file downloadSupplementary]
